# Supplementary material for: A BiVO4/Bi2Mo2O9 heterostructure towards oriented charge transfer for efficient photoelectrochemical water oxidation
Source: Royal Society of Chemistry journal article supplement (doi:10.1039/d4se00734d), 2024-01-01
Supplement: d4se00734d1.pdf [file d4se00734d1.pdf]

*Electronic Supplementary Information (ESI)*

**BiVO<sub>4</sub>/Bi<sub>2</sub>Mo<sub>2</sub>O<sub>9</sub> heterostructure towards oriented charge transfer for efficient photoelectrochemical water oxidation**

Yuli Xiong<sup>a\*</sup>, Nan Zhou<sup>a</sup>, Yuting Zhou<sup>a</sup>, Bo Peng<sup>a</sup>, Yuting Cui<sup>a</sup>, Peng Yu<sup>a\*</sup>,

Zhenxiang Cheng<sup>b\*</sup>

<sup>a</sup> College of Physics and Electronic Engineering, Chongqing Normal University, Chongqing 401331, P. R. China.

<sup>b</sup> Institute for Superconducting and Electronic Materials, Faculty of Engineering and Information Sciences, University of Wollongong, Innovation Campus, Squires Way, North Wollongong, NSW 2500, Australia.

Corresponding authors: ylxiong@cqnu.edu.cn (Y. Xiong), pengyu@cqnu.edu.cn (P. Yu), cheng@uow.edu.au (Z. Cheng).

**Keywords:** BiVO<sub>4</sub>/Bi<sub>2</sub>Mo<sub>2</sub>O<sub>9</sub>, interfacial interaction, charge transfer, solar energy, photoelectrochemical

## **1. Experimental Section**

### ***1.1 Material characterizations***

The crystalline phases of the samples were determined by X-ray power diffraction (XRD) using a Shimadzu ZD-3AX diffractometer with CuK $\alpha$  radiation ( $\lambda = 1.5418 \text{ \AA}$ ) at a scan rate of  $2^\circ$  per min in the angular range from  $5^\circ$  to  $90^\circ$ . The morphology and high-resolution microstructure images were observed through a field emission scanning electron microscope (FE-SEM, Hitachi, Regulus 8220) and a transmission electron microscopy (TEM, Talos F200S, 200kV) separately. The UV-Vis light absorption spectra were recorded with a spectrophotometer (UV-3600, Shimadzu) in the region of 300 – 800 nm. Room temperature photoluminescence (PL) measurements were carried out with a fluorescence spectrometer (Cary eclipse) with an excitation wavelength of 360 nm. The time-resolved PL measurement was carried out with Edinburgh FS5 with an excitation wavelength of 365 nm. The surface composition and chemical states analysis was carried out by an X-ray photoelectron spectroscopy (XPS, ESCALab250).

### ***1.2 Photoelectrochemical measurements***

Electrochemical tests were carried out using a Zahner Zennium electrochemical workstation operated in a standard three-electrode configuration, with a photoelectrode ( $1 \text{ cm}^2$ ) used as the working electrode. Meanwhile, a Pt coil (diameter is 1 mm, length is 5 cm) served as the counter electrode, an Ag/AgCl electrode (saturated KCl) used as the reference electrode. In a typical experiment, 0.2 M KPi with/without 0.5 M Na<sub>2</sub>SO<sub>3</sub> as a hole scavenger was used as the electrolyte. The photo-response of the synthesized electrodes were measured under front-side illumination by a 300 W Xenon arc lamp

(NBet HSX-F300, China) equipped with an AM 1.5G filter (Ceaulight). The intensity of the light source was calibrated with a UV enhanced silicon photo-detector (Newport, Models 1916C and 818-UV) to simulate AM 1.5 illumination ( $100 \text{ mW cm}^{-2}$ ). For all the samples, a scan rate of  $25 \text{ mV s}^{-1}$  used for the photocurrent-voltage ( $J$ - $V$ ) character. A photocurrent stability test was performed at a fixed bias potential of  $1.23 \text{ V}$  vs RHE under illumination. And the incident photon to current efficiency (IPCE) performance was performed at a fixed bias potential of  $1.23 \text{ V}$  vs RHE under illumination. Mott-Schottky plots were obtained in the electrolyte of  $0.2 \text{ M KPi}$  under illumination at an ac frequency of  $500$  and  $1000 \text{ Hz}$ . The carrier concentration and the flat potential can be estimated by the following equation:

$$(A_s/C_{\text{bulk}})^2 = (2/e\epsilon\epsilon_0N_d)[V - V_{\text{FB}} - k_B T/e] \quad (1)$$

Where  $A_s$  is the efficient area of electrode,  $C_{\text{bulk}}$  is the space charge capacitance,  $\epsilon$  is the dielectric constant of the samples,  $\epsilon_0$  is the permittivity under vacuum ( $8.85 \times 10^{-12} \text{ C}^2 \text{ J}^{-1} \text{ m}^{-2}$ ),  $N_d$  is the carrier density of the samples,  $V$  is the applied potential,  $V_{\text{FB}}$  is the flat band potential,  $k_B$  is the Boltzmann constant ( $1.38 \times 10^{-23} \text{ J K}^{-1}$ ),  $T$  ( $298 \text{ K}$ ) is the absolute temperature, and  $e$  is the electron charge ( $1.602 \times 10^{-19} \text{ C}$ ).

The measured potential versus Ag/AgCl was converted to RHE potential by the Nernst equation

$$E_{\text{RHE}} = E_{\text{Ag/AgCl}} + 0.0591 \text{ pH} + 0.1976 \quad (2)$$

The photocurrent density arising from PEC performance ( $J_{\text{water}}$ ) can be described as follows:

$$J_{\text{water}} = J_{\text{abs}} \times \eta_{\text{sep}} \times \eta_{\text{oxi}} \quad (3)$$

where  $J_{\text{abs}}$  is the photocurrent density when completely converting the absorbed photons into current (i.e., APCE = 100%).  $\eta_{\text{sep}}$  is the efficiency of charge separation and  $\eta_{\text{oxi}}$  is the efficiency of surface oxidation kinetics. Adding 0.5 M  $\text{Na}_2\text{SO}_3$  to the electrolyte can completely suppress the surface recombination of charge carriers without influencing the charge separation in the electrode bulk (i.e.,  $\eta_{\text{oxi}} = 100\%$ ). Therefore,  $\eta_{\text{sep}}$  and  $\eta_{\text{oxi}}$  can be expressed as follows:

$$\eta_{\text{sep}} = J_{\text{sulfite}} / J_{\text{abs}} \quad (4)$$

$$\eta_{\text{oxi}} = J_{\text{water}} / J_{\text{sulfite}} \quad (5)$$

where  $J_{\text{water}}$  is the photocurrent density for water oxidation;  $J_{\text{sulfite}}$  is the photocurrent density for sulfite oxidation. By estimating the overlapped areas between the AM 1.5G illumination, assuming APCE = 100%, the  $J_{\text{abs}}$  of  $\text{Bi}_2\text{Mo}_2\text{O}_9$  and  $\text{BiVO}_4/\text{Bi}_2\text{Mo}_2\text{O}_9$  photoanodes are derived to be around 1.7 and 2.2  $\text{mA cm}^{-2}$ .

## 2. Figures

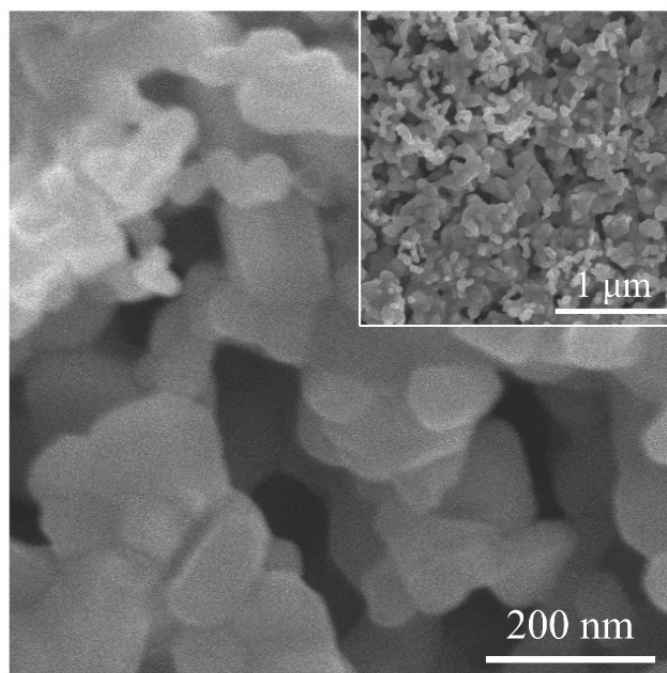

**Figure S1.** Top view SEM images of  $\text{Bi}_2\text{Mo}_2\text{O}_9$ , inset is the low magnification view.

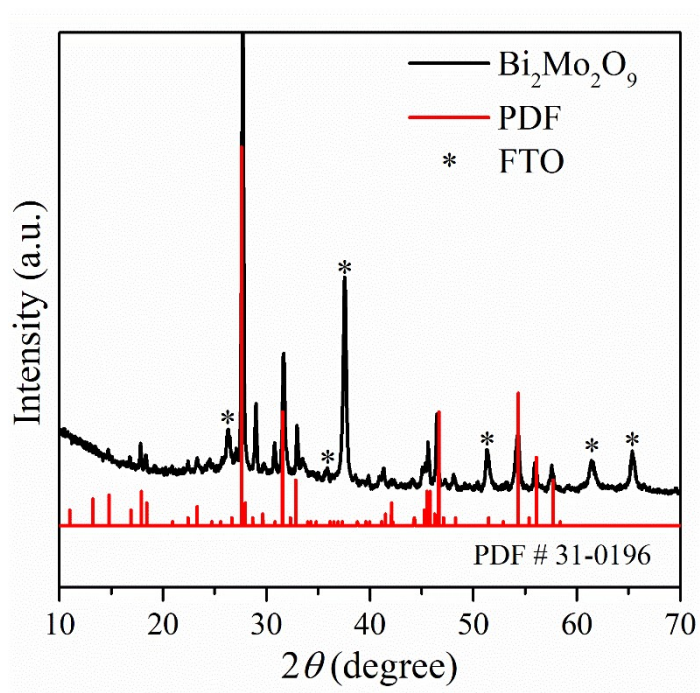

**Figure S2.** XRD spectra of  $\text{Bi}_2\text{Mo}_2\text{O}_9$  and the FTO substrate.

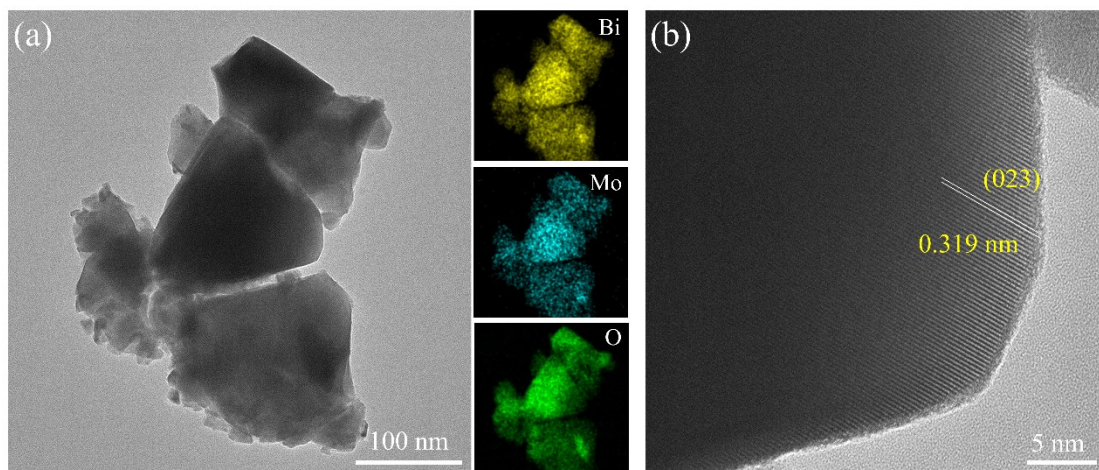

**Figure S3.** (a) TEM and the corresponding EDS elemental mappings of  $\text{Bi}_2\text{Mo}_2\text{O}_9$ , (b) HRTEM image of  $\text{Bi}_2\text{Mo}_2\text{O}_9$ .

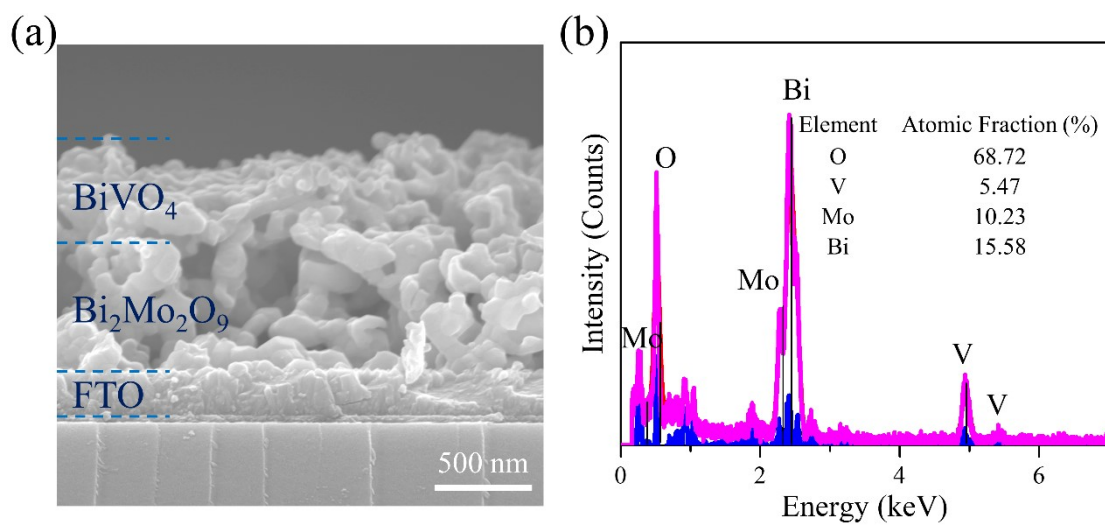

**Figure S4.** (a) The cross-sectional SEM of  $\text{BiVO}_4/\text{Bi}_2\text{Mo}_2\text{O}_9$ , the thickness of outer layer  $\text{BiVO}_4$  and inner layer  $\text{Bi}_2\text{Mo}_2\text{O}_9$  is around 400 nm and 600 nm. (b) TEM-corresponding EDX spectra of  $\text{BiVO}_4/\text{Bi}_2\text{Mo}_2\text{O}_9$ .

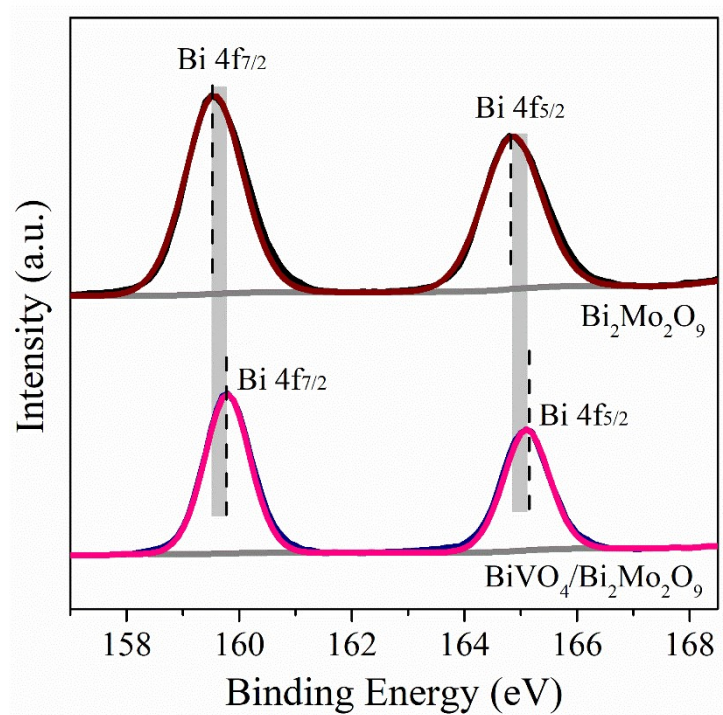

**Figure S5.** The high-resolution XPS spectra of Bi 4f for  $\text{Bi}_2\text{Mo}_2\text{O}_9$  and  $\text{BiVO}_4/\text{Bi}_2\text{Mo}_2\text{O}_9$ .

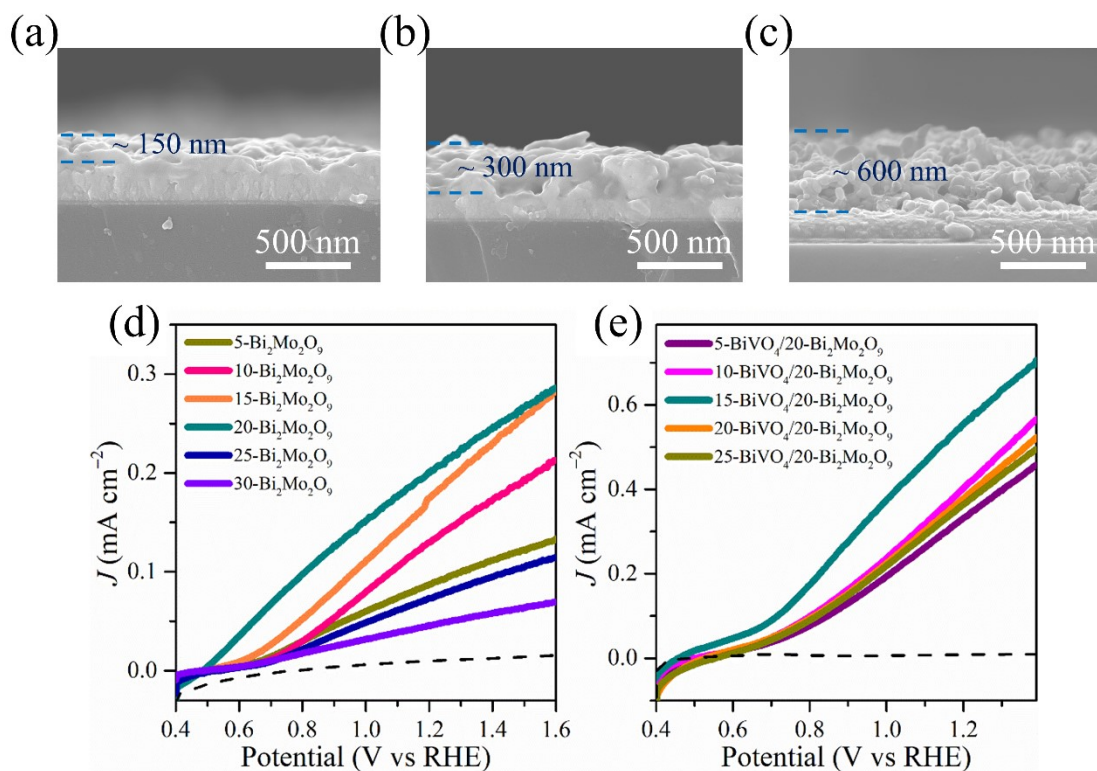

**Figure S6.** The cross-sectional SEM images of (a) 5- $\text{Bi}_2\text{Mo}_2\text{O}_9$ , (b) 10- $\text{Bi}_2\text{Mo}_2\text{O}_9$ , and (c) 20- $\text{Bi}_2\text{Mo}_2\text{O}_9$ , the results suggest the thickness is around 150 nm, 300, and 600 nm. (d) Photocurrent of 5- $\text{Bi}_2\text{Mo}_2\text{O}_9$  (5 represent SILAR cycle numbers), 10- $\text{Bi}_2\text{Mo}_2\text{O}_9$ , 15- $\text{Bi}_2\text{Mo}_2\text{O}_9$ , 20- $\text{Bi}_2\text{Mo}_2\text{O}_9$ , 25- $\text{Bi}_2\text{Mo}_2\text{O}_9$ , and 30- $\text{Bi}_2\text{Mo}_2\text{O}_9$  photoanodes in 0.2 M KPi solution (pH 7.0) under AM 1.5G illumination ( $100 \text{ mW cm}^{-2}$ ) for PEC water oxidation. (e) The linear scanning voltammetry plots of  $\text{BiVO}_4/\text{Bi}_2\text{Mo}_2\text{O}_9$  with different  $\text{BiVO}_4$  thickness.



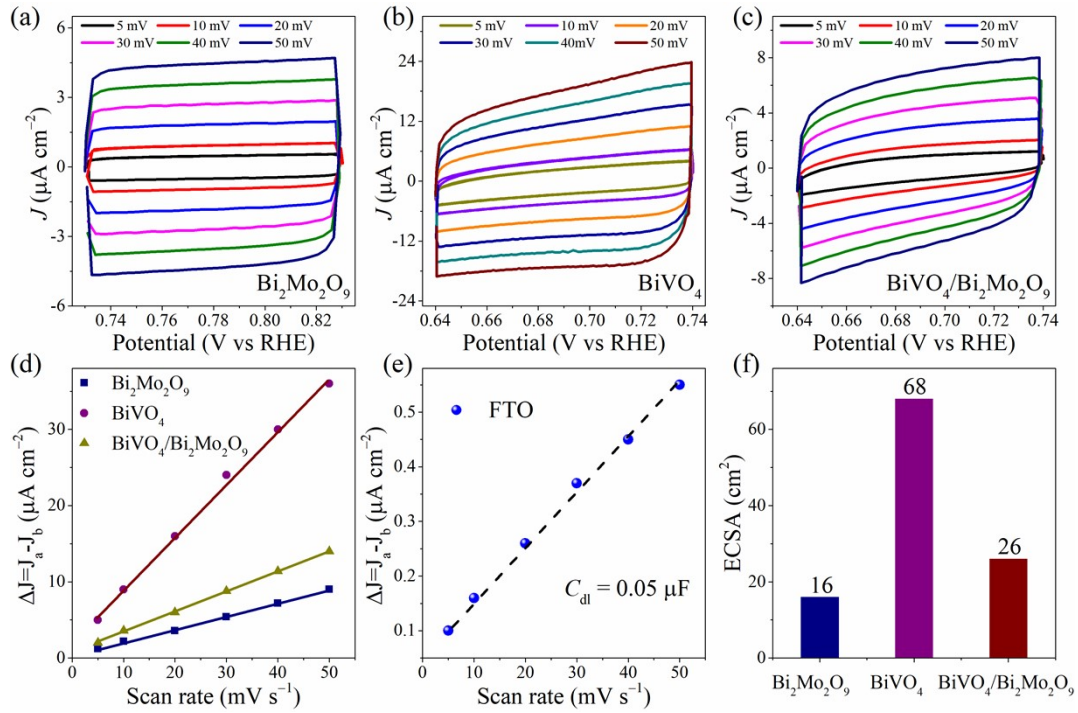

**Figure S7.** Cyclic voltammogram (CV) scans of (a)  $\text{Bi}_2\text{Mo}_2\text{O}_9$ , (b)  $\text{BiVO}_4$ , and (c)  $\text{BiVO}_4/\text{Bi}_2\text{Mo}_2\text{O}_9$  in 0.2 M KPi solution, and the scanning rate is 5, 10, 20, 30, 40, and 50  $\text{mV s}^{-1}$ , respectively. (d) Charge current density difference ( $\Delta J = J_a - J_c$ ;  $J_a$  and  $J_c$  is the positive and negative current at 0.78 V vs RHE for  $\text{Bi}_2\text{Mo}_2\text{O}_9$ , 0.69 V vs RHE for  $\text{BiVO}_4$ , and 0.69 V vs RHE for  $\text{BiVO}_4/\text{Bi}_2\text{Mo}_2\text{O}_9$ ) plotted against scan rates for various samples. (e)  $\Delta J$  plotted against scan rates for the FTO substrate for the determination of special capacitance ( $C_s$ ) at 0.6 V vs RHE. (f) The ECSA for these samples, which was estimated from the electrochemical double-layer capacitance ( $C_{dl}$ ) by measuring  $\text{CV}_s$  in a non-Faradaic region. The  $C_{dl}$  values were determined from the slope of anodic-cathodic current density difference divided by two versus the scan rate. Therefore, the  $C_{dl}$  value for the  $\text{Bi}_2\text{Mo}_2\text{O}_9$ ,  $\text{BiVO}_4$  and  $\text{BiVO}_4/\text{Bi}_2\text{Mo}_2\text{O}_9$  is approximately 0.8, 3.4 and 1.3  $\mu\text{F cm}^{-2}$ , respectively, and the  $C_s$  of FTO is 0.05  $\mu\text{F cm}^{-2}$ . The ECSA was calculated by using the equation:  $\text{ECSA} = C_{dl} / C_s$ .

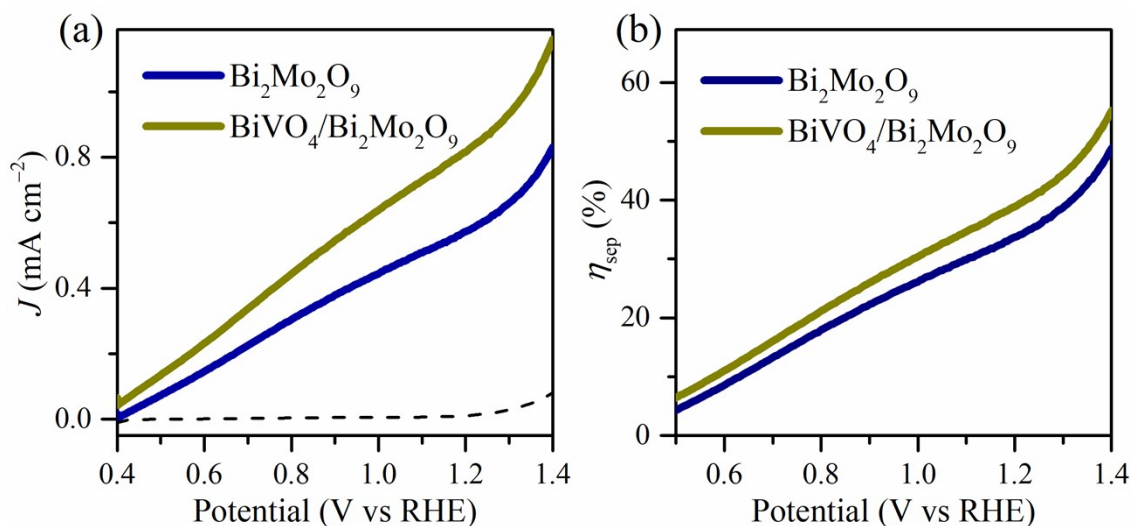

**Figure S8.** (a) Photocurrent density of Bi<sub>2</sub>Mo<sub>2</sub>O<sub>9</sub> and BiVO<sub>4</sub>/Bi<sub>2</sub>Mo<sub>2</sub>O<sub>9</sub> in 0.2 M KPi with 0.5 M Na<sub>2</sub>SO<sub>3</sub> solution. (b) Charge separation efficiency of these samples.

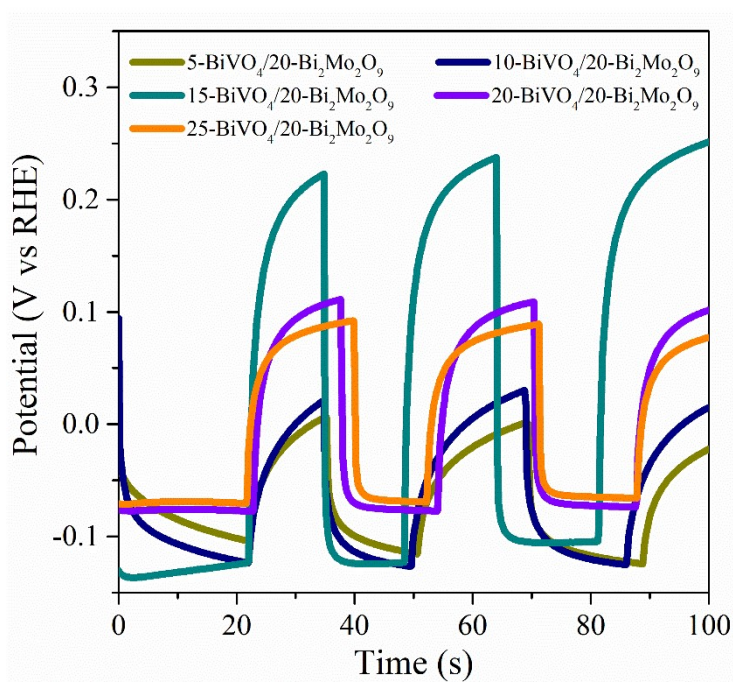

**Figure S9.** The open-circuit potential decay curves of all samples.

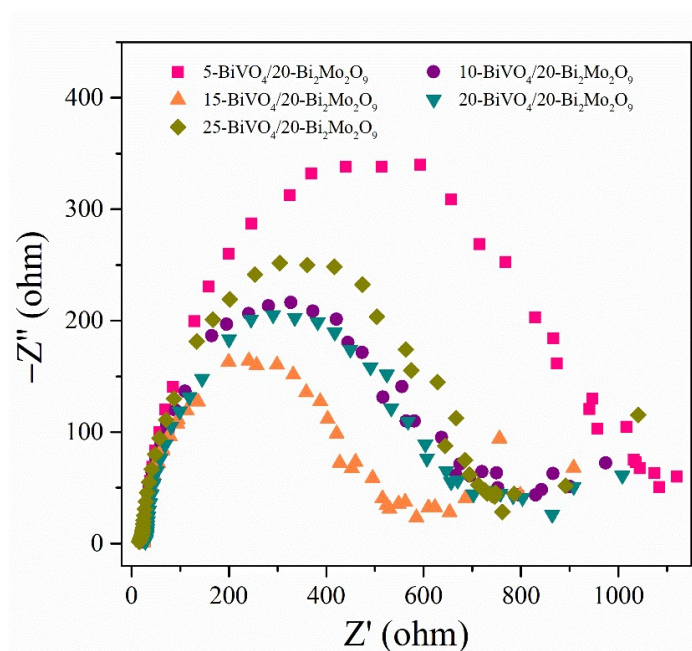

**Figure S10.** EIS tests of different photoanodes under AM 1.5 G illumination.

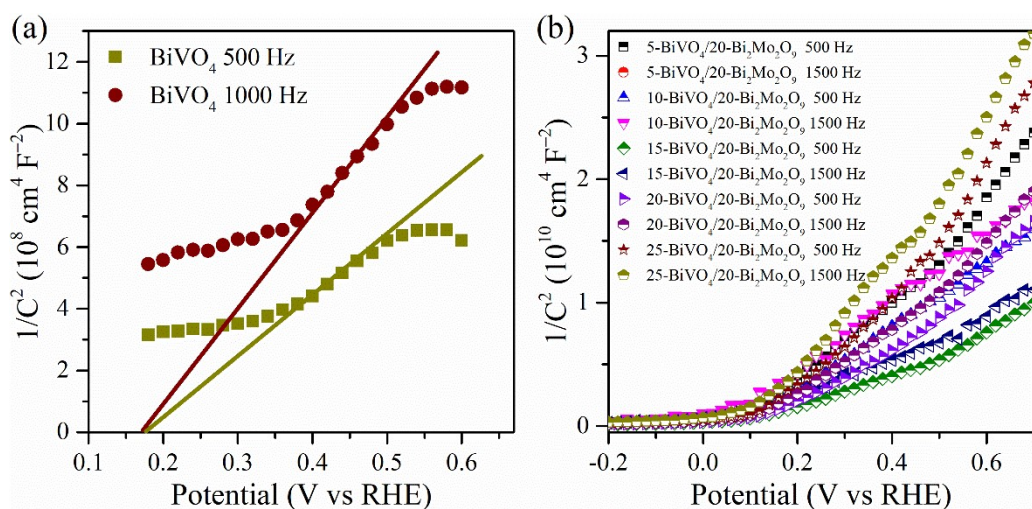

**Figure S11.** (a) Mott-Schottky curves of  $\text{BiVO}_4$  under different frequencies in dark, (b) Mott-Schottky curves of different  $\text{BiVO}_4/\text{Bi}_2\text{Mo}_2\text{O}_9$  photoanodes under different frequencies in dark. The  $\text{BiVO}_4$  has a lower slope, indicating the higher carrier density in dark. However, under light illumination, due to the sluggish charge transfer dynamic and fast charge recombination, the photocurrent of bare  $\text{BiVO}_4$  is low. To enhance the charge transfer rate, we constructed the  $\text{BiVO}_4/\text{Bi}_2\text{Mo}_2\text{O}_9$  heterostructure.

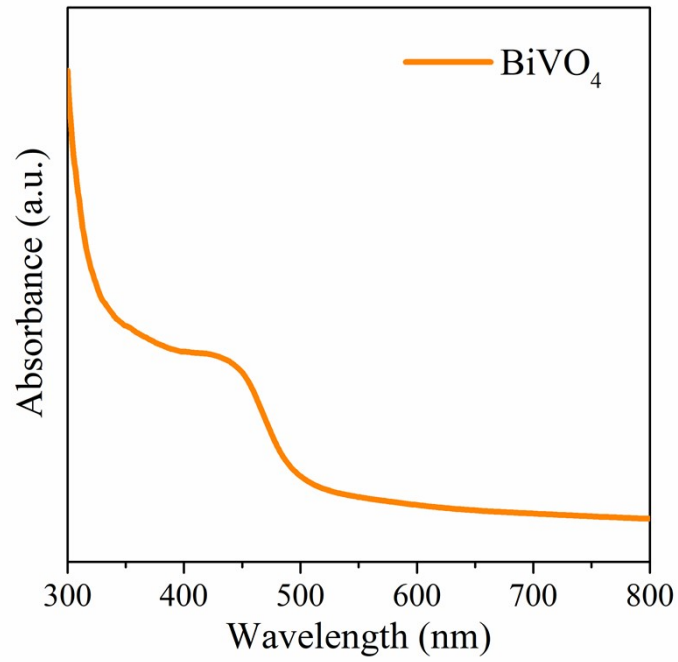

**Figure S12.** UV-Vis absorption spectrum of  $\text{BiVO}_4$ .

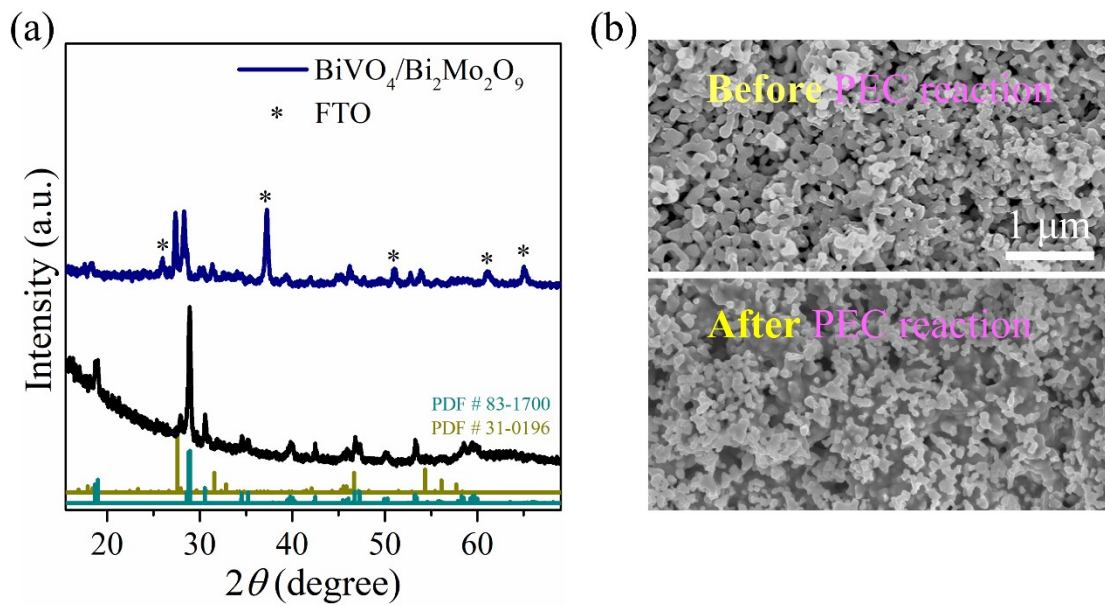

**Figure S13.** (a) XRD pattern of  $\text{BiVO}_4/\text{Bi}_2\text{Mo}_2\text{O}_9$  heterostructure before/after PEC stability tests. (b) SEM image of  $\text{BiVO}_4/\text{Bi}_2\text{Mo}_2\text{O}_9$  photoanodes before/after PEC reactions.

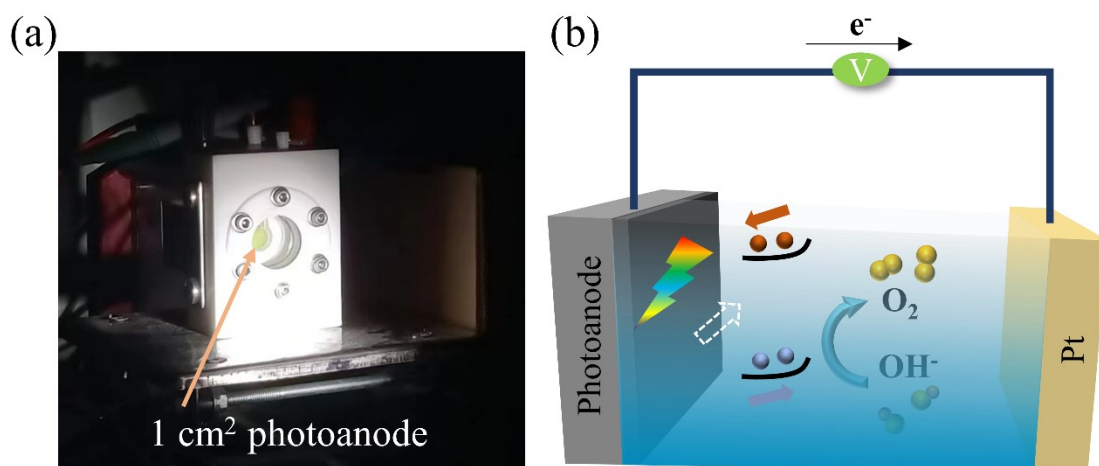

**Figure S14.** (a) Physical setup of the PEC cell, the solar light is illuminated by front direction. For this cell, the reaction surface of photoanode is fixed to 1 cm<sup>2</sup> by a Teflon plastic circular gasket. (b) Schematic of the PEC water oxidation (AM 1.5G illumination, 100 mW cm<sup>-2</sup>).

**Table S1.** PEC performances of different photoanodes for water oxidation.

|                            | Bi <sub>2</sub> Mo <sub>2</sub> O <sub>9</sub> | BiVO <sub>4</sub> /Bi <sub>2</sub> Mo <sub>2</sub> O <sub>9</sub> |
|----------------------------|------------------------------------------------|-------------------------------------------------------------------|
| Onset potential (V)        | 0.55                                           | 0.41                                                              |
| $J$ (mA cm <sup>-2</sup> ) | 0.18                                           | 0.61                                                              |
| $\eta_{\text{sep}}$        | 35%                                            | 41%                                                               |
| $\eta_{\text{oxi}}$        | 30.2%                                          | 70.1%                                                             |
| Photovoltage (mV)          | 150                                            | 340                                                               |

$\eta_{\text{sep}}$ : charge separation efficiency (at 1.23 V vs RHE)

$\eta_{\text{oxi}}$ : oxidation kinetics efficiency (at 1.23 V vs RHE)

**Table S2.** ICP tests of BiVO<sub>4</sub>/Bi<sub>2</sub>Mo<sub>2</sub>O<sub>9</sub> photoanodes in 20 ml 5% HNO<sub>3</sub> solution, the detected elements including Bi, V, O, and Mo elements. 1 cm<sup>2</sup> of all photoanodes were used, the weight of each sample is ~2 mg.

| Samples                                                                                     | Atomic concentration (μmol L <sup>-1</sup> ) |     |     |       | Atomic ratio of Bi:Mo:V:O |
|---------------------------------------------------------------------------------------------|----------------------------------------------|-----|-----|-------|---------------------------|
|                                                                                             | Bi                                           | Mo  | V   | O     |                           |
| BiVO <sub>4</sub> /Bi <sub>2</sub> Mo <sub>2</sub> O <sub>9</sub> (before <i>J</i> -t test) | 13.5                                         | 8.8 | 4.7 | 59.61 | 1:0.65:0.34:4.4           |
| BiVO <sub>4</sub> /Bi <sub>2</sub> Mo <sub>2</sub> O <sub>9</sub> (after <i>J</i> -t test)  | 13.4                                         | 8.3 | 4.5 | 59.67 | 1:0.65:0.34:4.5           |

**Table S3.** Relevant works of photocurrent enhancement by bismuth molybdate based photoelectrodes at 1.23 V vs RHE.

| Sample                                                                           | Electrolyte                           | Photocurrent             | Ref.             |
|----------------------------------------------------------------------------------|---------------------------------------|--------------------------|------------------|
| Bi <sub>2</sub> Mo <sub>2</sub> O <sub>9</sub> -Bi <sub>2</sub> MoO <sub>6</sub> | 0.1 M Na <sub>2</sub> SO <sub>4</sub> | 0.22 mA cm <sup>-2</sup> | [1]              |
| Bi <sub>2</sub> MoO <sub>6</sub> @Bi <sub>2</sub> Mo <sub>2</sub> O <sub>9</sub> | 0.5 M KPi                             | 0.16 mA cm <sup>-2</sup> | [2]              |
| W doped Bi <sub>2</sub> MoO <sub>6</sub>                                         | 0.1 M Na <sub>2</sub> SO <sub>4</sub> | 0.11 mA cm <sup>-2</sup> | [3]              |
| Bi <sub>2</sub> MoO <sub>6</sub> /TiO <sub>2</sub>                               | 0.1 M KOH                             | 0.35 mA cm <sup>-2</sup> | [4]              |
| Bi <sub>2</sub> MoO <sub>6</sub> /Bi <sub>2</sub> S <sub>3</sub>                 | 0.1 M Na <sub>2</sub> SO <sub>4</sub> | 1.4 mA cm <sup>-2</sup>  | [5]              |
| BiVO <sub>4</sub> /Bi <sub>2</sub> Mo <sub>2</sub> O <sub>9</sub>                | 0.2 M KPi                             | 0.61 mA cm <sup>-2</sup> | <b>This work</b> |

## References

[1] S. Baduri, D. Sariket, D. Raya, S. Ghosh, J. K. Singh, H-S. Lee, C. Bhattachary, Optimization of semiconductor–electrolyte interfacial phenomena for stable and efficient photoelectrochemical water oxidation behavior of Bi<sub>2</sub>Mo<sub>2</sub>O<sub>9</sub>-Bi<sub>2</sub>MoO<sub>6</sub> heterojunction. *Electrochim. Acta* 2021, 372, 137754.

- [2] Y. Xiong, L. Yang, H. He, J. Wan, P. Xiao, W. Guo, Enhanced charge separation and transfer by  $\text{Bi}_2\text{MoO}_6@\text{Bi}_2\text{Mo}_2\text{O}_9$  compound using SILAR for photoelectrochemical water oxidation. *Electrochim. Acta* 2018, 264, 26–35.
- [3] M. Chakraborty, S. Ghosh, V. Mahalingam, Fe and W doped  $\text{Bi}_2\text{MoO}_6$  nanoflakes: a promising material for efficient solar water splitting. *Sustain. Energy Fuels* 2020, 4, 1507–1514.
- [4] Y. Lou, D. Qiu, S. Chen, H. Chen, L. Wang, Z. Hao, C. He, Y. Chen, X. Cui, Integrating  $\text{Bi}_2\text{MoO}_6$  nanoflakes into  $\text{TiO}_2$  photoanode for efficient charge separation in photoelectrochemical water splitting. *J. Environ. Chem. Eng.* 2023, 11, 111215.
- [5] N. Le, N. T. N. Truong, N. H. Lam, A. M. Tamboli, M. S. Tamboli, M. R. Pallavolu, C. D. Kim, J. Jung, J. H. Jung, Direct growth of  $\text{Bi}_2\text{S}_3$  nanorods onto the  $\text{Bi}_2\text{MoO}_6$  nanoflakes: A promising heterostructure for efficient photoelectrochemical water-splitting application. *FlatChem* 2023, 37, 100468.
